# Supplementary material for: Effects of Artemisia dracunculus L. Water Extracts on Selected Pests and Aphid Predator Coccinella septempunctata L.
Source: MDPI journal article supplement (doi:10.3390/agronomy12040788), 2022-03-25
Supplement: s1 [file s1]

**Table S1.** Anova result on the surface area eaten up of broad bean leaf by male *Sitona lineatus* L.

| Hours | Sum of Squares | df | Mean Square | F     | p     |
|-------|----------------|----|-------------|-------|-------|
| 8h    | 39.120         | 6  | 6.520       | 4.261 | 0.004 |
| 16h   | 197.168        | 6  | 32.861      | 6.746 | 0.000 |
| 24h   | 394.265        | 6  | 65.711      | 7.920 | 0.000 |
| 32h   | 865.493        | 6  | 144.249     | 5.112 | 0.001 |
| 40h   | 1239.150       | 6  | 206.525     | 5.460 | 0.001 |
| 48h   | 1612.635       | 6  | 268.772     | 5.494 | 0.001 |
| 56h   | 1581.297       | 6  | 263.549     | 4.089 | 0.005 |
| 80h   | 1962.626       | 6  | 327.104     | 5.940 | 0.000 |
| 104h  | 3080.459       | 6  | 513.410     | 8.293 | 0.000 |

**Table S2.** Anova result on the surface area eaten up of broad bean leaf by female *Sitona lineatus* L.

| Hours | Sum of Squares | df | Mean Square | F     | p     |
|-------|----------------|----|-------------|-------|-------|
| 8h    | 48.924         | 6  | 8.154       | 1.829 | 0.122 |
| 16h   | 311.216        | 6  | 51.869      | 4.736 | 0.001 |
| 24h   | 730.263        | 6  | 121.711     | 5.289 | 0.001 |
| 32h   | 963.477        | 6  | 160.579     | 3.278 | 0.012 |
| 40h   | 2024.869       | 6  | 337.478     | 6.616 | 0.000 |
| 48h   | 3040.178       | 6  | 506.696     | 5.294 | 0.001 |
| 56h   | 3706.330       | 6  | 617.722     | 5.366 | 0.001 |
| 80h   | 8784.185       | 6  | 1464.031    | 5.415 | 0.000 |
| 104h  | 11532.303      | 6  | 1922.050    | 5.157 | 0.001 |

**Table S3.** Anova result on the absolute deterrence index.

| Sex     | Sum of Squares | df | Mean Square | F     | p     |
|---------|----------------|----|-------------|-------|-------|
| Males   | 11610.837      | 5  | 2322.167    | 4.164 | 0.003 |
| Females | 7944.723       | 5  | 1588.945    | 3.360 | 0.011 |

**Table S4.** Anova result on the mortality of *Aphis fabae* Scop nymphs.

| Hours | Sum of Squares | df | Mean Square | F     | p     |
|-------|----------------|----|-------------|-------|-------|
| 12h   | 3.886          | 6  | 0.648       | 1.679 | 0.163 |
| 24h   | 16.743         | 6  | 2.790       | 3.830 | 0.007 |
| 36h   | 47.771         | 6  | 7.962       | 4.354 | 0.003 |
| 48h   | 79.886         | 6  | 13.314      | 4.198 | 0.004 |
| 60h   | 110.286        | 6  | 18.381      | 5.957 | 0.000 |
| 72h   | 110.286        | 6  | 18.381      | 6.598 | 0.000 |
| 84h   | 114.971        | 6  | 19.162      | 8.767 | 0.000 |
| 96h   | 98.286         | 6  | 16.381      | 7.212 | 0.000 |
| 108h  | 122.400        | 6  | 20.400      | 8.707 | 0.000 |

**Table S5.** Anova result on the mortality of wingless females of *Aphis fabae* Scop.

| Hours | Sum of Squares | df | Mean Square | F      | p     |
|-------|----------------|----|-------------|--------|-------|
| 12h   | 1.000          | 6  | 0.167       | 1.207  | 0.326 |
| 24h   | 1.952          | 6  | 0.325       | 1.395  | 0.244 |
| 36h   | 20.286         | 6  | 3.381       | 3.170  | 0.014 |
| 48h   | 25.286         | 6  | 4.214       | 3.020  | 0.017 |
| 60h   | 25.143         | 6  | 4.190       | 2.100  | 0.078 |
| 72h   | 33.667         | 6  | 5.611       | 2.465  | 0.043 |
| 84h   | 46.905         | 6  | 7.817       | 3.791  | 0.005 |
| 96h   | 67.333         | 6  | 11.222      | 10.761 | 0.000 |
| 108h  | 83.286         | 6  | 13.881      | 14.150 | 0.000 |

**Table S6.** Anova result on body weight gain of L2 larvae of *Leptinotarsa decemlineata* Say.

| Hours | Sum of Squares | df | Mean Square | F     | p     |
|-------|----------------|----|-------------|-------|-------|
| 24h   | 221.086        | 6  | 36.848      | 1.860 | 0.123 |
| 48h   | 883.143        | 6  | 147.190     | 2.814 | 0.029 |
| 72h   | 1278.743       | 6  | 213.124     | 3.514 | 0.010 |
| 96h   | 2436.743       | 6  | 406.124     | 4.629 | 0.002 |
| 120h  | 3642.286       | 6  | 607.048     | 5.447 | 0.001 |
| 144h  | 5384.800       | 6  | 897.467     | 5.702 | 0.001 |

**Table S7.** Anova result on body weight gain of L4 larvae of *Leptinotarsa decemlineata* Say.

| Hours | Sum of Squares | df | Mean Square | F     | p     |
|-------|----------------|----|-------------|-------|-------|
| 24h   | 132.905        | 6  | 22.151      | 1.682 | 0.155 |
| 48h   | 400.810        | 6  | 66.802      | 1.656 | 0.161 |
| 72h   | 677.571        | 6  | 112.929     | 2.562 | 0.037 |
| 96h   | 992.286        | 6  | 165.381     | 3.023 | 0.017 |
| 120h  | 1383.143       | 6  | 230.524     | 4.521 | 0.002 |
| 144h  | 1697.619       | 6  | 282.937     | 5.294 | 0.001 |

**Table S8.** Anova result on the number of aphids eaten by one L3 larvae of *Coccinella septempunctata* L.

| Hours | Sum of Squares | df | Mean Square | F     | p     |
|-------|----------------|----|-------------|-------|-------|
| 24h   | 46.619         | 6  | 7.770       | 1.081 | 0.392 |
| 36h   | 95.952         | 6  | 15.992      | 1.026 | 0.425 |
| 48h   | 154.333        | 6  | 25.722      | 1.144 | 0.358 |
| 60h   | 170.905        | 6  | 28.484      | 0.769 | 0.599 |
| 72h   | 300.810        | 6  | 50.135      | 1.371 | 0.254 |
| 84h   | 127.905        | 6  | 21.317      | 0.499 | 0.804 |
| 96h   | 465.905        | 6  | 77.651      | 1.502 | 0.206 |
| 108h  | 849.619        | 6  | 141.603     | 1.813 | 0.125 |
| 120h  | 743.952        | 6  | 123.992     | 1.315 | 0.276 |

**Table S9.** Anova result on the mean number of aphids eaten by one L3 larvae of *Coccinella septempunctata* L.

| Sum of Squares | df | Mean Square | F     | p     |
|----------------|----|-------------|-------|-------|
| 1505.841       | 6  | 250.9735    | 5.296 | 0.000 |
